# Supplementary material
Source: PubMed Central journal article supplement (PMC8740563)

Supplemental Fig. 1

Supplemental Fig. 2.

A

**S293A + CMP**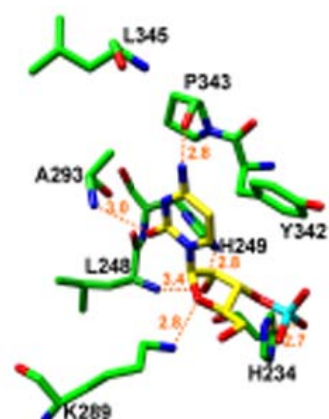

B

**S293A merged with WT**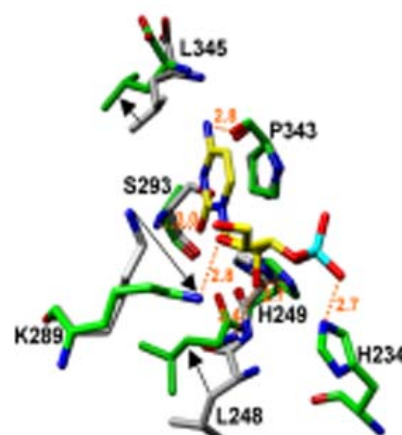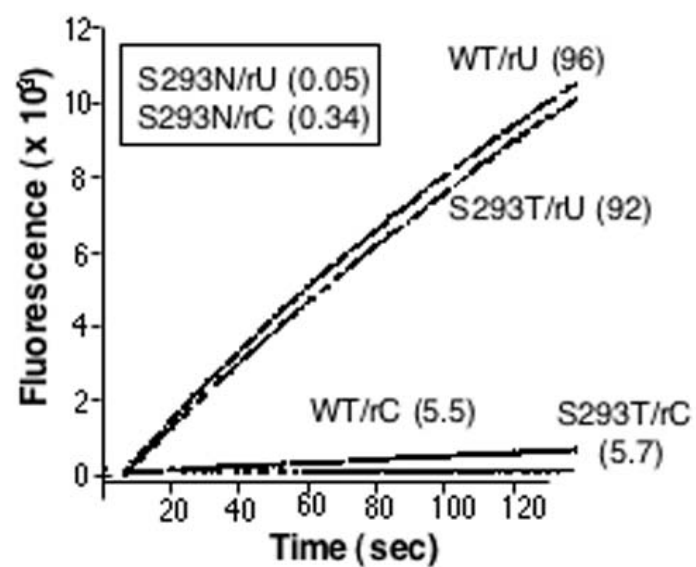

Supplemental Fig. 3

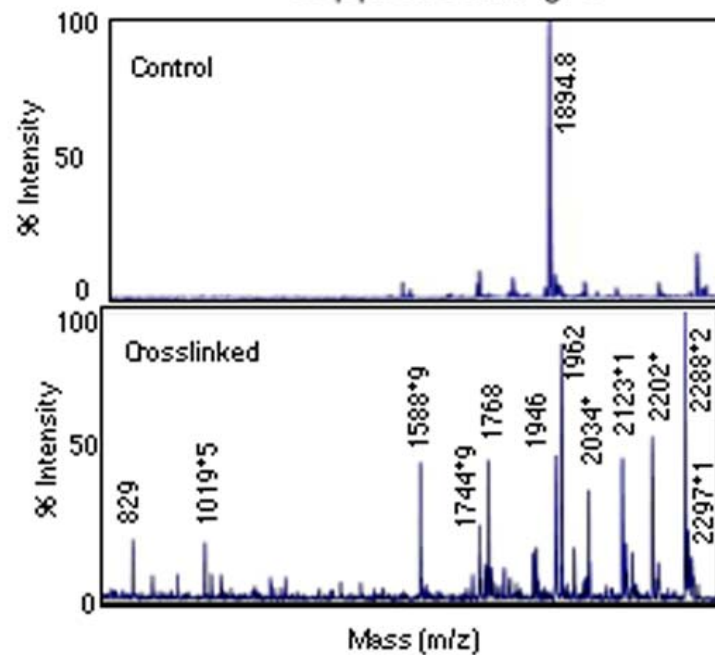

Supplement: mmc1.pdf [file mmc1.pdf]
